# Supplementary material for: Enhancing metabolite coverage in MALDI-MSI using laser post-ionisation (MALDI-2)
Source: Royal Society of Chemistry journal article supplement (doi:10.1039/d3ay01046e), 2023-01-01
Supplement: d3ay01046e1.pdf [file d3ay01046e1.pdf]

## Supporting Information

For

### Enhancing Metabolite Coverage in MALDI-MSI using Laser Post-Ionisation (MALDI-2).

J.C.McKinnon,<sup>a</sup> H.H.Milioli,<sup>b,c,d</sup> C.A.Purcell,<sup>b,c,d</sup> C.L.Chaffer,<sup>b,c,d</sup> B.Wadie,<sup>e</sup> T.Alexandrov,<sup>e</sup> T.W.Mitchell<sup>f</sup> and S.R.Ellis\*<sup>a</sup>

<sup>a</sup> Molecular Horizons and School of Chemistry and Molecular Bioscience, University of Wollongong, Northfields Ave, Wollongong, NSW 2522, Australia.

<sup>b</sup> Garvan Institute of Medical Research, Darlinghurst, NSW, Australia

<sup>c</sup> St. Vincent's Clinical School, UNSW Medicine, UNSW Sydney, NSW, Australia

<sup>d</sup> The Kinghorn Cancer Centre, Darlinghurst, NSW, Australia

<sup>e</sup> Structural and Computational Biology Unit, European Molecular Biology Laboratory (EMBL), Heidelberg, Germany.

<sup>f</sup> Molecular Horizons and School of Medical, Indigenous and Health Science, University of Wollongong, Northfields Ave, Wollongong, NSW 2522, Australia

*To whom correspondence should be addressed:*

[sellis@uow.edu.au](mailto:sellis@uow.edu.au)

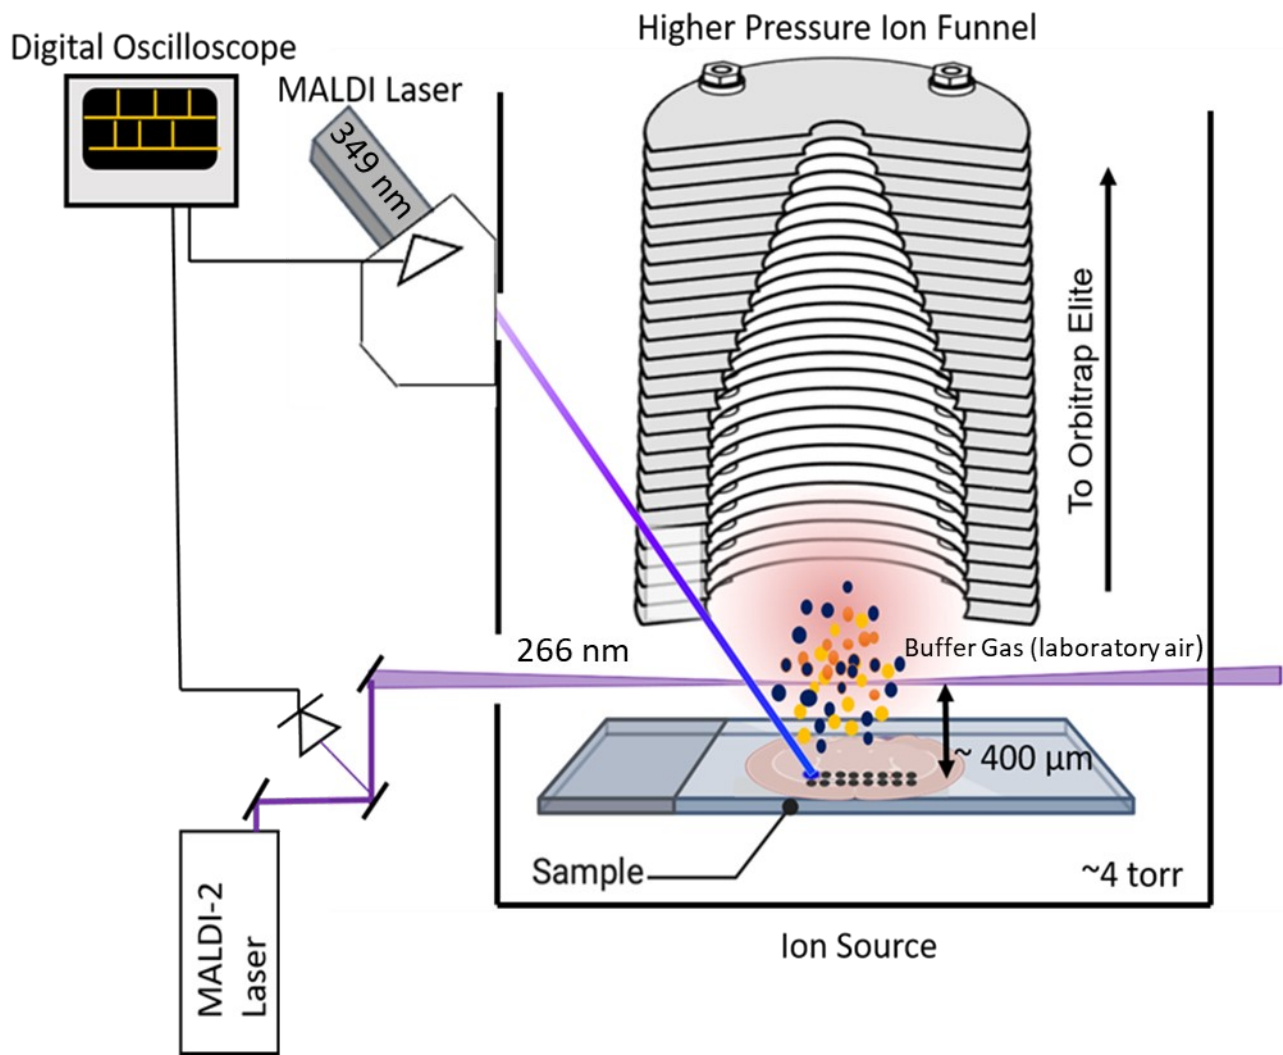

Figure S1: Schematic of experimental set-up.

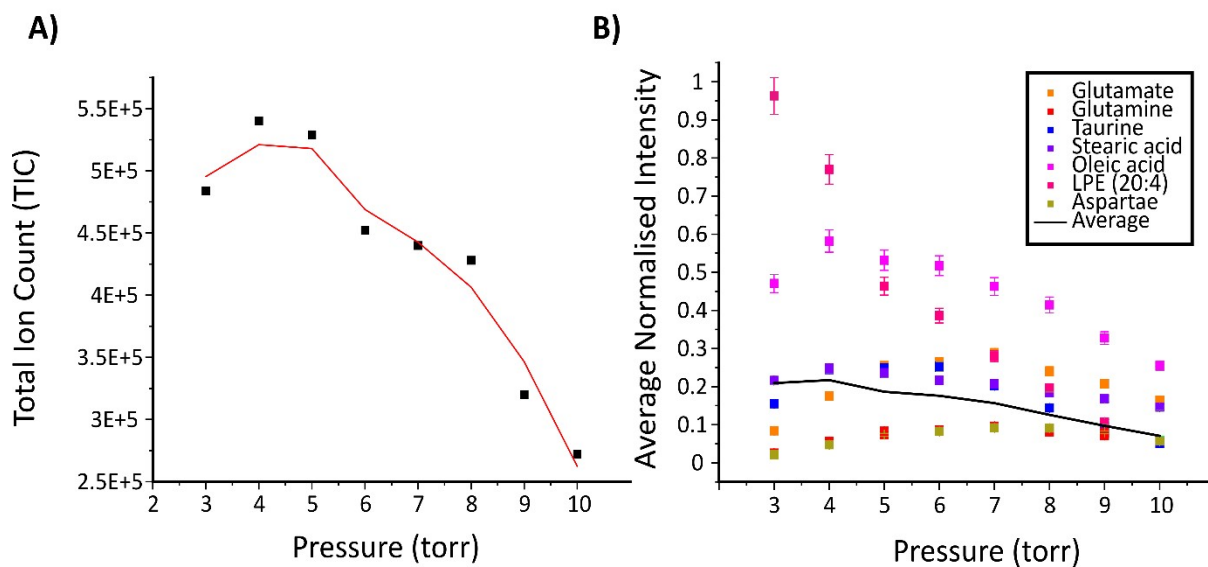

**Figure S2:** **A)** the influence of ion source pressure on the total ion count (TIC) of successive line scans across liver homogenate tissue acquired in the negative ion mode at a 60  $\mu\text{m}$  x 60  $\mu\text{m}$  pixel size. **B)** the derived ion intensities of selected tentatively identified analytes from pressure optimisation experiments ( $n=3$ ) as detailed in the methods section of the main text. Error bars display the  $\pm 1$  standard deviation for each data point ( $n=3$  measurements).

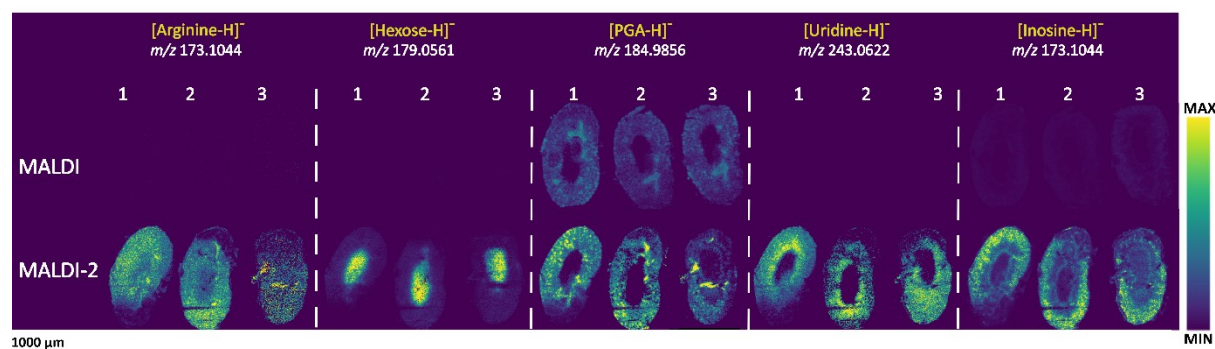

**Figure S3:** Metabolite images across ( $n = 3$ ) technical replicates of the species shown in Fig.2c-g of main text. The resulting images are displayed with no normalisation applied so as to directly compare changes in absolute signal intensity between each method. Hotspot removal (high quantile value 99%) was applied for visualisation of ion images.

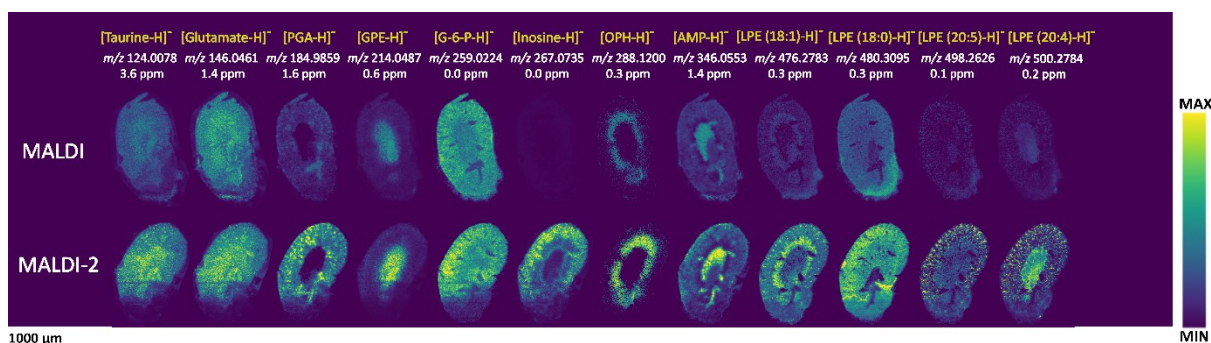

**Figure S4:** Selected ion images generated via MALDI (M) and MALDI-2 (M-2) of endogenous metabolite species detected from adjacent mouse kidney tissue with a pixel size of  $60\ \mu\text{m} \times 60\ \mu\text{m}$ . The resulting images are displayed with no normalisation applied so as to directly compare changes in absolute signal intensity between each method. Hotspot removal (high quantile value 99%) was applied for visualisation of ion images.

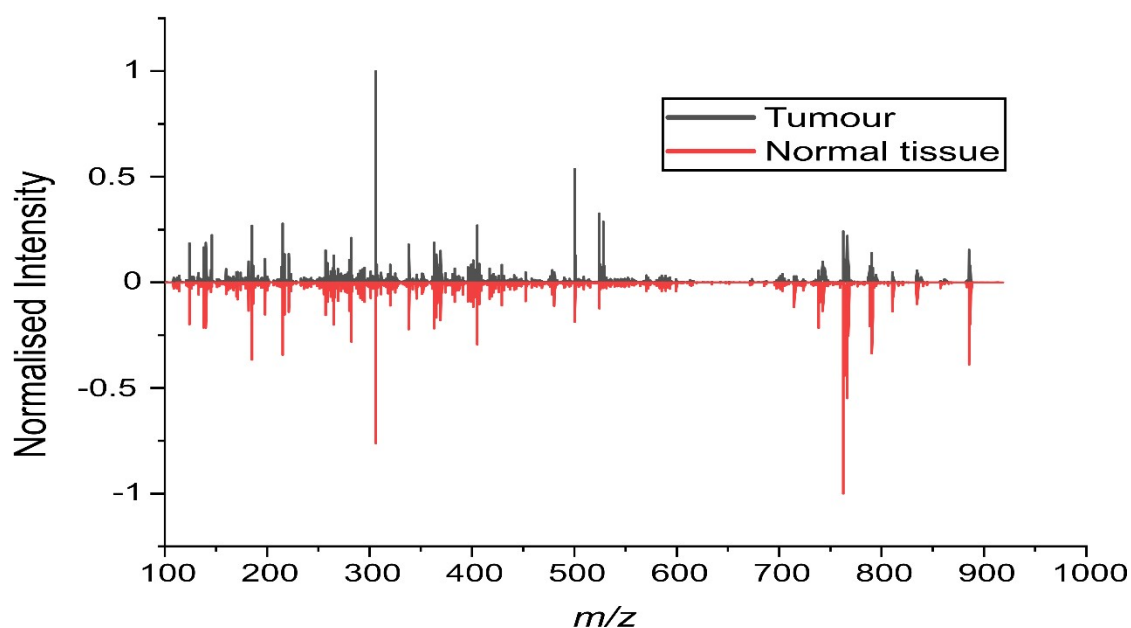

**Figure S5:** Averaged MALDI-2-MSI on-tissue spectra from the tumour and normal liver tissue defined regions for data shown in Figure 3.

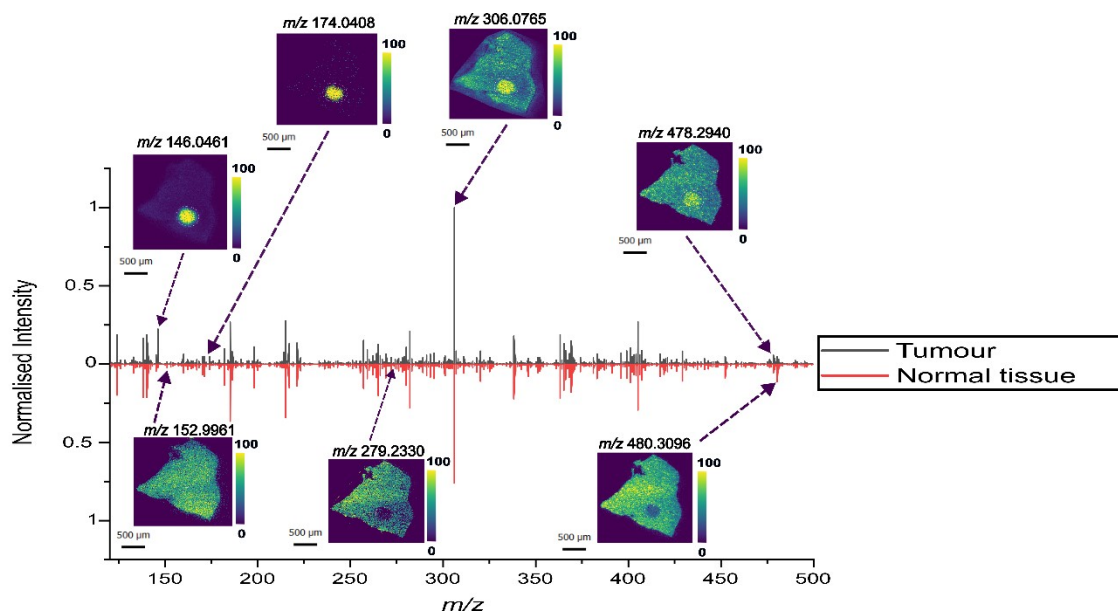

**Figure S6:** Enlarged  $m/z$  100-500 range from the MALDI-2 derived cancer dataset shown in Figure 3. Averaged normalised spectrum from tumour region is shown as the black trace, and the surrounding tissue in the red trace. Ion images of selected  $m/z$  values are also provided. Ion images are visualised following total-ion current normalisation and hotspot removal (high quantile value 99%).

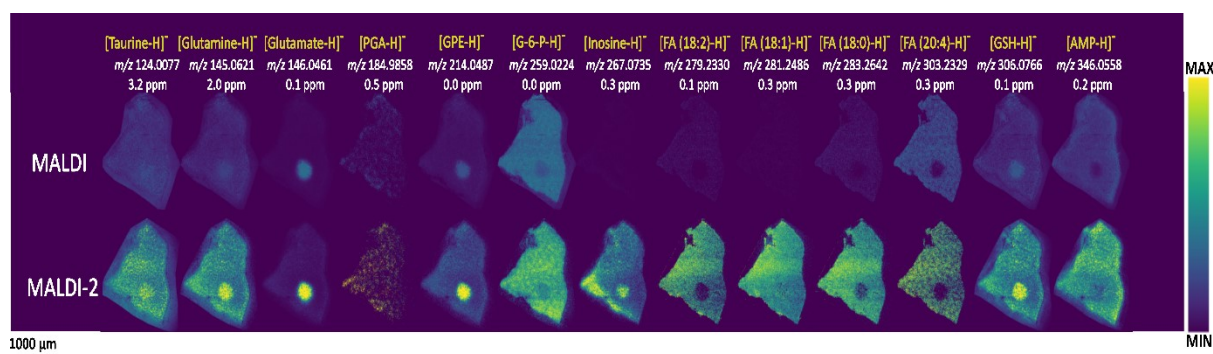

**Figure S7:** Selected ion images generated via MALDI (M) and MALDI-2 (M-2) of endogenous metabolite species detected from adjacent mouse kidney tissue with a pixel size of 60 μm x 60 μm. The resulting images are displayed with no normalisation applied so as to directly compare changes in absolute signal intensity between each method.

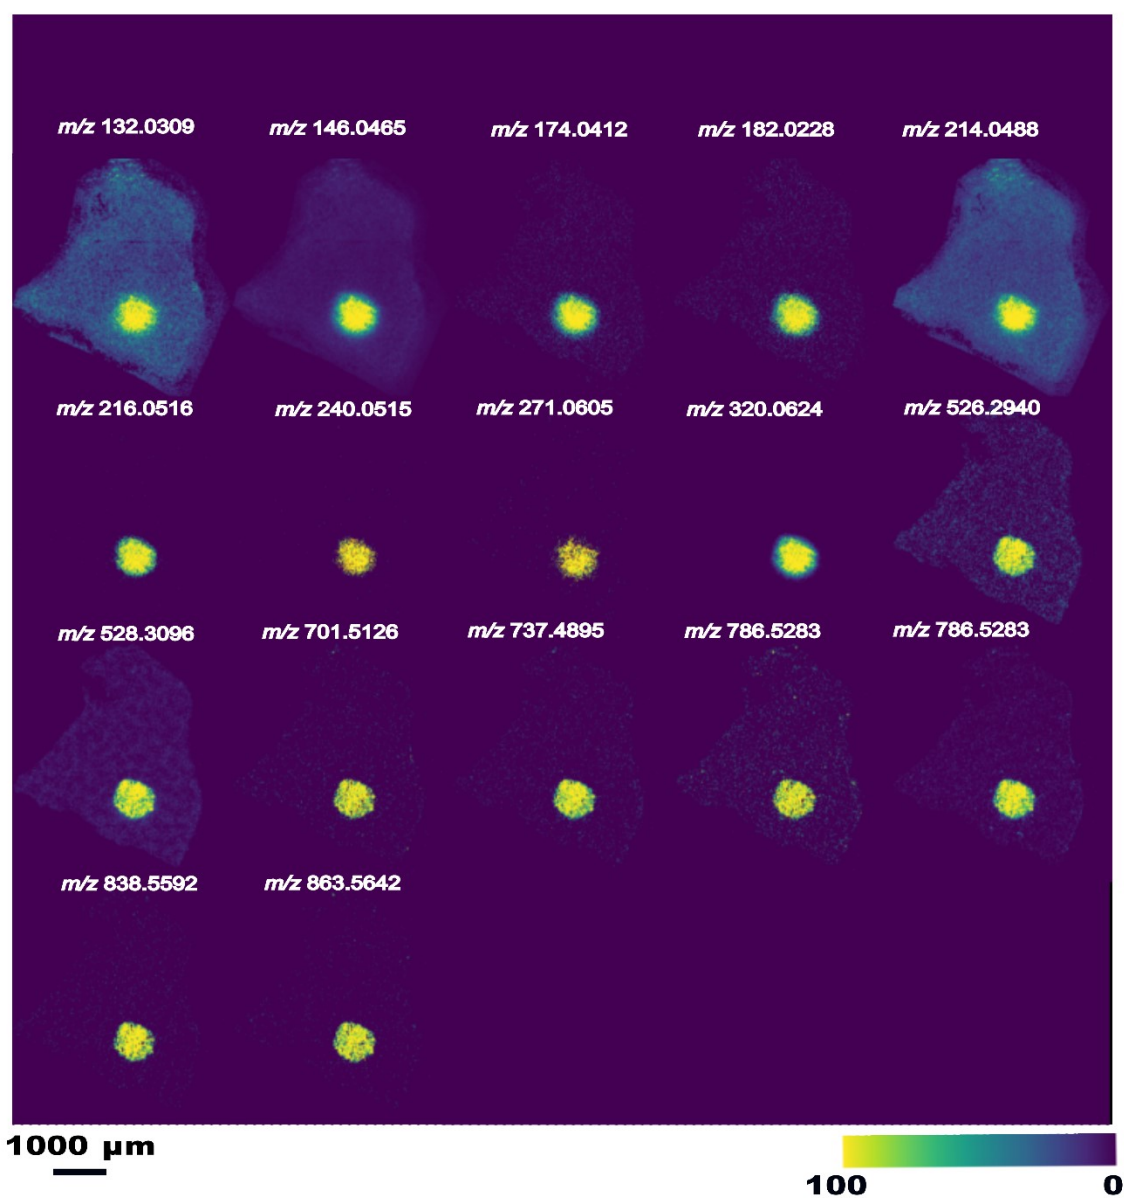

**Figure S8:** Ion images for  $m/z$  values which co-localise to the tumour tissue region generated using conventional MALDI-MSI from an adjacent tissue section to that shown in Figure 3. All images are referenced to the tumour region defined on the H&E stained tissue following co-registration with the MSI data and have Pearson correlation coefficients  $\geq 0.6$  with the tumour region. All images are generated using total ion count normalisation and hotspot removal (high quantile value 99%). Hotspot removal (high quantile value 99%) was applied for visualisation of ion images.

**Table S1:** Summary of laser parameters for both MALDI and MALDI-2 approaches. Note primary laser pulse energy is the pulse energy after passing through an external attenuator.

|                | Primary laser freq. (Hz) | Primary laser diode current (Amps) | Primary laser pulse energy ( $\mu$ J) | PI laser freq. (Hz) | PI laser pulse energy ( $\mu$ J) |
|----------------|--------------------------|------------------------------------|---------------------------------------|---------------------|----------------------------------|
| <b>MALDI</b>   | 300                      | 1.8                                | 1.44                                  | -                   | -                                |
| <b>MALDI-2</b> | 300                      | 1.8                                | 1.44                                  | 300                 | 600                              |

**Table S2:** Table of 34 unique annotations from Figure 3 of main text provided as their sum elemental formula.

| Elemental Formula  | Adduct          | <i>m/z</i>         |
|--------------------|-----------------|--------------------|
| <b>MgCl2</b>       | [M+Cl]-         | 128.8921           |
| <b>C4H7NO4</b>     | [M-H]-          | 132.0302           |
| <b>H3O4P</b>       | [M+Cl]-         | 132.9463           |
| <b>CaCl2</b>       | [M+Cl]-         | 144.8697           |
| <b>C6H8O5</b>      | [M-H]-          | 159.0299           |
| <b>C13H6</b>       | [M-H]-          | 161.0396           |
| <b>C11H8N2</b>     | [M-H]-          | 167.0614           |
| <b>C2H8NO4P</b>    | [M+Cl]-         | 175.9885           |
| <b>H4O7P2</b>      | [M-H]-          | 176.9359           |
| <b>C6H8O7</b>      | [M-H]-          | 191.0197           |
| <b>C6H10O5</b>     | [M+Cl]-         | 197.0222           |
| <b>C5H13O7P</b>    | [M-H]-          | 215.0326           |
| <b>C16H12NO3</b>   | [M-H]-          | 265.0744           |
| <b>C14H20O6</b>    | [M-H]-          | 283.1187           |
| <b>C15H13ClO6</b>  | [M-H]-          | 323.0328           |
| <b>C18H28N2O4</b>  | [M-H]-          | 335.1976           |
| <b>C23H30O4</b>    | [M-H]-          | 369.2071           |
| <b>C25H35NO4</b>   | [M-H]-          | 412.2493           |
| <b>C24H30O4</b>    | [M+Cl]-         | 417.1838           |
| <b>C23H30O5</b>    | [M-H]-          | 421.1787           |
| <b>C23H29ClO4</b>  | [M+Cl]-         | 439.1448           |
| <b>C23H35NO6S</b>  | [M-H]-          | 452.2112           |
| <b>C26H26O9</b>    | [M-H]-          | 481.1504           |
| <b>C24H40N5O8</b>  | [M-H]-          | 525.2804           |
| <b>C33H35N5O5</b>  | [M-H]-          | 580.2565           |
| <b>C21H39N7O12</b> | [M-H]-          | 580.2584           |
| <b>C33H37N5O5</b>  | [M-H]-          | 582.2722           |
| <b>C32H45NO9</b>   | [M-H]-          | 586.3021           |
| <b>C8H8O3</b>      | [M-H]-, [M+Cl]- | 151.0400, 187.0167 |
| <b>C6H14N4O2</b>   | [M-H]-, [M+Cl]- | 173.1044, 209.0810 |
| <b>C12H14N2</b>    | [M-H]-, [M+Cl]- | 185.1084, 221.0851 |
| <b>C23H24O4</b>    | [M-H]-, [M+Cl]- | 363.1601, 399.1368 |
| <b>C23H31ClO4</b>  | [M-H]-, [M+Cl]- | 405.1838, 441.1604 |
| <b>C25H40N2O6S</b> | [M-H]-, [M+Cl]- | 495.2534, 531.2301 |

**Table S3:** Table of tentative metabolite annotations for species discussed in the main text.

| <b>Elemental Formula</b> | <b>Adduct</b> | <b>Theoretical m/z</b> | <b>Observed m/z</b> | <b>Name</b>                    | <b>m/z error (ppm)</b> |
|--------------------------|---------------|------------------------|---------------------|--------------------------------|------------------------|
| C2H7NO3S                 | M-H           | 124.0073               | 124.0078            | Taurine                        | 3.6                    |
| C5H10N2O3                | M-H           | 145.0619               | 145.0618            | Glutamine                      | -0.7                   |
| C5H9NO4                  | M-H           | 146.0459               | 146.0461            | Glutamate                      | 1.4                    |
| C6H14N4O2                | M-H           | 173.10436              | 173.1047            | Arginine                       | 1.7                    |
| C6H9NO5                  | M-H           | 174.0408               | 174.0406            | <i>N</i> -acetyl-aspartic acid | -1.1                   |
| C2H8NO4PCI               | M+Cl          | 175.9885               | 175.9886            | Phosphoethanolamine            | 0.6                    |
| C6H12O6                  | M-H           | 179.0561               | 179.0565            | Hexose                         | 2.2                    |
| C5H9NO4Cl                | M+Cl          | 182.0226               | 182.0227            | Glutamate                      | 0.5                    |
| C3H7O7P                  | M-H           | 184.9856               | 184.9859            | 2-Phosphoglyceric acid         | 1.6                    |
| C5H14NO6P                | M-H           | 214.0486               | 214.0487            | glycerophosphoethanolamine     | 0.6                    |
| C6H12O6Cl                | M+Cl          | 215.0328               | 215.0332            | Hexose                         | 1.9                    |
| C9H12N2O6                | M-H           | 243.0622               | 243.0621            | Uridine                        | -0.4                   |
| C6H13O9P                 | M-H           | 259.0224               | 259.0224            | Glucose-6-phosphate            | 0.0                    |
| C10H12N4O5               | M-H           | 267.0735               | 267.0735            | Inosine                        | 0.0                    |
| C18H32O2                 | M-H           | 279.2329               | 279.2330            | FA 18:2                        | 0.4                    |
| C10H17N3O6S              | M-H           | 306.0765               | 306.0765            | Glutathione                    | 0.0                    |
| C10H14N5O7P              | M-H           | 346.0558               | 346.0553            | Adenosine monophosphate        | -1.4                   |
| C23H46NO7P               | M-H           | 478.2939               | 478.294             | LPE (18:1)                     | 0.2                    |
| C23H48NO7P               | M-H           | 480.3095               | 480.3097            | LPE (18:0)                     | 0.3                    |
| C25H44NO7P               | M-H           | 500.2783               | 500.2784            | LPE (20:4)                     | 0.2                    |
| C27H46NO7P               | M-H           | 526.2939               | 526.2940            | LPE (22:5)                     | 0.2                    |
| C27H48NO7P               | M-H           | 528.3095               | 528.3097            | LPE (22:4)                     | 0.4                    |
| C27H50NO7P               | M-H           | 530.3252               | 530.3253            | LPE(22:3)                      | 0.2                    |
| C29H50NO7P               | M-H           | 554.3252               | 554.3256            | LPE(24:5)                      | 0.7                    |
| C29H47NO7                | M+Cl          | 556.3047               | 556.3045            | Deoxycholyglutamic acid        | -0.4                   |
| C39H75O8P                | M-H           | 701.5216               | 701.5218            | PA(36:1)                       | 0.3                    |
| C41H80NO8P               | M-H           | 744.5548               | 744.5554            | PE(36:1)                       | 0.8                    |
| C40H76NO10P              | M-H           | 760.5134               | 760.5132            | PS(34:1)                       | -0.3                   |
| C42H78NO10P              | M-H           | 786.5290               | 786.5286            | PS(36:2)                       | -0.5                   |
| C42H80NO10P              | M-H           | 788.5447               | 788.5440            | PS(36:1)                       | -0.9                   |
| C45H80NO8P               | M-H           | 792.5544               | 792.5546            | PE(40:5)                       | 0.3                    |
| C46H81NO10P              | M-H           | 838.5604               | 838.5588            | PS(40:4)                       | -1.9                   |
| C45H84O13P               | M-H           | 863.5655               | 863.5647            | PI(36:1)                       | -0.9                   |

FA = Fatty acid

LPE – Lysophosphatidylethanolamine

PA – Phosphatidic acid

PE – Phosphatidylethanolamine

PS – Phosphatidylserine

PI - Phosphatidylinositol



\*\* The presence of analyte isomers cannot be discounted, with putative identifications provided on the basis of high-resolution accurate mass matching to metabolite databases.
